# Supplementary material
Source: publisher figshare collection journal article supplement (https://sage.figshare.com/ndownloader/files/13438094)
Supplement: Supplementary file 1 [file 13438094]

# Appendix 1:

## Focus group questions and prompt examples

| Case Discussion                                                                                                                                                                                                                                                                                                                                                                                                                                                                                                                                                                                                                                                                                                                                                                                                                                                                                                                                                                                                                                                                                                                                                                                                                                                                                                                                                                      |                                                                                                                                                                                                                                                                                                                                                                                                                                                                                                                        |
|--------------------------------------------------------------------------------------------------------------------------------------------------------------------------------------------------------------------------------------------------------------------------------------------------------------------------------------------------------------------------------------------------------------------------------------------------------------------------------------------------------------------------------------------------------------------------------------------------------------------------------------------------------------------------------------------------------------------------------------------------------------------------------------------------------------------------------------------------------------------------------------------------------------------------------------------------------------------------------------------------------------------------------------------------------------------------------------------------------------------------------------------------------------------------------------------------------------------------------------------------------------------------------------------------------------------------------------------------------------------------------------|------------------------------------------------------------------------------------------------------------------------------------------------------------------------------------------------------------------------------------------------------------------------------------------------------------------------------------------------------------------------------------------------------------------------------------------------------------------------------------------------------------------------|
| <ul style="list-style-type: none"> <li>• 77-year-old woman</li> <li>• Reduced mobility and falls, chronic pain, constipation, cognition, and polypharmacy</li> <li>• PMH: cerebrovascular disease, CAD, hypertension, dementia, fibromyalgia, myositis, bipolar disorder, arthritis, remote duodenal ulcer, hypothyroidism</li> <li>• Frustrated by loss of independence (daily assistance with washing and dressing)</li> <li>• Retirement residence staff managing medications, LTC placement being considered</li> <li>• On admission: wheelchair-bound, heavily sedated, making interviewing and assessment difficult</li> <li>• Near-falls attempting to self-transfer and could not stand unsupported, OH</li> <li>• Creatinine clearance 30 mL/min (Cockcroft-Gault equation with ideal body weight)</li> </ul>                                                                                                                                                                                                                                                                                                                                                                                                                                                                                                                                                               |                                                                                                                                                                                                                                                                                                                                                                                                                                                                                                                        |
| Medication List                                                                                                                                                                                                                                                                                                                                                                                                                                                                                                                                                                                                                                                                                                                                                                                                                                                                                                                                                                                                                                                                                                                                                                                                                                                                                                                                                                      |                                                                                                                                                                                                                                                                                                                                                                                                                                                                                                                        |
| <ul style="list-style-type: none"> <li>• Quinapril 40 mg daily</li> <li>• Amlodipine 5 mg daily</li> <li>• Diltiazem ER 360 mg daily</li> <li>• Acebutolol 200 mg twice daily</li> <li>• Nitroglycerin patch 0.6 mg/h qhs</li> <li>• Nitroglycerin 0.4 mg spray prn</li> <li>• Furosemide 40 mg daily</li> <li>• Dipyridamole/ASA 200/25 mg bid</li> <li>• Rosuvastatin 20 mg twice daily</li> <li>• Levothyroxine 0.088 mg daily</li> <li>• Tiotropium 18 mcg daily</li> <li>• Salbutamol 100 mcg, 2 puffs qid prn</li> <li>• Galantamine ER 16 mg daily</li> <li>• Levofloxacin 250 mg daily</li> <li>• Morphine 10 mg qhs</li> </ul>                                                                                                                                                                                                                                                                                                                                                                                                                                                                                                                                                                                                                                                                                                                                              | <ul style="list-style-type: none"> <li>• Acetaminophen 650 mg q4h prn</li> <li>• Cyclobenzaprine 5 mg tid</li> <li>• Glucosamine 500 mg bid</li> <li>• Amitriptyline 75 mg qhs</li> <li>• Oxazepam 15 mg qhs</li> <li>• Lactulose 15 mL daily prn</li> <li>• Magnesium hydroxide 311 mg 1–2 tablets qhs</li> <li>• Fibre in water</li> <li>• Carter's liver pill 2 pills prn</li> <li>• "Suppository"</li> <li>• Cranberry 500 mg tid</li> <li>• Carbamazepine 200 mg bid</li> <li>• Omeprazole 20 mg daily</li> </ul> |
| Questions                                                                                                                                                                                                                                                                                                                                                                                                                                                                                                                                                                                                                                                                                                                                                                                                                                                                                                                                                                                                                                                                                                                                                                                                                                                                                                                                                                            |                                                                                                                                                                                                                                                                                                                                                                                                                                                                                                                        |
| <ul style="list-style-type: none"> <li>• In this patient, is there anything you could do within your scope of practice that could minimize this patient's use of medications?             <ul style="list-style-type: none"> <li>– Could any of the patient's symptoms be caused by a drug?</li> <li>– Could any of the patient's symptoms or syndromes be treated by something other than a drug?</li> </ul> </li> <li>• How would you like to communicate your role to other members of the team?</li> <li>• How would you like to communicate the information about your roles to patients and their families?</li> <li>• How would you like to facilitate continuity of treatment and coordination of care across services and professionals?</li> <li>• How would you like to decide takes on what role or task for a particular patient?</li> <li>• What is the best way for your team to work together to manage such a patient: meetings, sequences, SOP?</li> <li>• What are the principles and values your team has developed in working together? How were these developed?</li> <li>• How would you like to decide on a plan for a patient?</li> <li>• How would you like to include the patient in your planning and decision making?</li> <li>• Is there anything important for interprofessional management of polypharmacy you feel has not been covered?</li> </ul> |                                                                                                                                                                                                                                                                                                                                                                                                                                                                                                                        |
